# Supplementary material
Source: Research Square preprint supplement (doi:10.21203/rs.3.rs-9150301/v1)
Supplement: Supplementary file 1 [file d0eecb18835ebc27f96ea2fb.docx]

**Clinically grounded multi-agent artificial intelligence for preventive health management**

Dongxin Ye1,2, Sicheng He1, Zhaowu Du3, Yu Yang1, Yu Xiao1, Liping Ren4, Nanqing Dong2,5, Fang Hu2, Jinsong Su3, Jie Zhang6, Yun Tan6, Li Zhao6, Yang Zhang3, *, Hao Lin1, *

1 School of Life Science and Technology, University of Electronic Science and Technology of China, Chengdu, 610054, China

2 Shanghai Innovation Institute, Shanghai 200231, China

3 State Key Laboratory of Southwestern Chinese Medicine Resources, Innovative Institute of Chinese Medicine and Pharmacy, Chengdu University of Traditional Chinese Medicine, Chengdu, 611137, China

4 School of Healthcare Technology, Chengdu Neusoft University, Chengdu, 611844, China

5 Shanghai Artificial Intelligence Laboratory, Shanghai 200232, China

6 Safety Environment Quality Surveillance & Inspection Research Institute, CNPC Chuanqing Drilling Engineering Company Ltd., Sichuan, 618300, China.

Yang Zhang: zhy1001@alu.uestc.edu.cn ; Hao Lin: hlin@uestc.edu.cn

**Supplementary Table**

**Table 1 | General Medical Evaluation. ACC of 15 models (M1–M15) on general medical benchmarks (CEval, MMLU, CMMLU, MMLU-PRO, MediQ).** We report category scores and averages; markers denote best and runner-up. Model mapping: M1 Qwen3-14B, M2 Qwen3-32B, M3 Meta-Llama-3.1-8B-Instruct, M4 GLM-4-9B-0414, M5 BioMistral-7B, M6 HuatuoGPT-o1-8B, M7 HuatuoGPT-o1-7B, M8 DISC-MedLLM-13B, M9 Baichuan-M1-14B-Instruct, M10 Baichuan-M2-32B, M11 OpenBioLLM-8B, M12 Meditron3-Qwen2.5-14B, M13 PMC-LLaMA-13B, M14 G-Health-14B-Base, M15 G-Health-32B-Base (* indicates rank 1; ** indicates rank 2; *** indicates rank 3).

| ID | M1 | M2 | M3 | M4 | M5 | M6 | M7 | M8 | M9 | M10 | M11 | M12 | M13 | M14 | M15 |
| --- | --- | --- | --- | --- | --- | --- | --- | --- | --- | --- | --- | --- | --- | --- | --- |
| CEval | | | | | | | | | | | | | | | |
| clinical_medicine | 0.8800 | 0.8750 | 0.5250 | 0.7650 | 0.3150 | 0.5350 | 0.8250 | 0.4900 | 0.8950 | 0.9050 | 0.3300 | 0.7650 | 0.3200 | 0.8750 | 0.8750 |
| physician | 0.8916 | 0.9300 | 0.6208 | 0.7472 | 0.4041 | 0.6005 | 0.8736 | 0.5485 | 0.8984 | 0.8758 | 0.4086 | 0.8352 | 0.3702 | 0.8962 | 0.9233 |
| basic_medicine | 0.9143 | 0.9200 | 0.5200 | 0.8114 | 0.3886 | 0.5600 | 0.8914 | 0.5429 | 0.8914 | 0.9086 | 0.3200 | 0.8457 | 0.2857 | 0.8857 | 0.9143 |
| veterinary_medicine | 0.9429 | 0.9095 | 0.5952 | 0.8143 | 0.4000 | 0.5762 | 0.9143 | 0.5000 | 0.8810 | 0.9048 | 0.3476 | 0.9000 | 0.3571 | 0.9190 | 0.9381 |
| sports_science | 0.8167 | 0.8333 | 0.5167 | 0.6778 | 0.3611 | 0.4667 | 0.7444 | 0.4111 | 0.7556 | 0.7889 | 0.4556 | 0.7667 | 0.3667 | 0.8278 | 0.8722 |
| high_school_biology | 0.9371 | 0.9371 | 0.4571 | 0.8000 | 0.4057 | 0.4686 | 0.8629 | 0.4914 | 0.8857 | 0.9257 | 0.3600 | 0.8400 | 0.3029 | 0.9086 | 0.9543 |
| average | ***0.8971 | **0.9008 | 0.5391 | 0.7693 | 0.3791 | 0.5345 | 0.8519 | 0.4973 | 0.8678 | 0.8848 | 0.3703 | 0.8254 | 0.3338 | 0.8854 | *0.9129 |
| MMLU | | | | | | | | | | | | | | | |
| college_biology | 0.9236 | 0.9375 | 0.6944 | 0.8750 | 0.6319 | 0.7222 | 0.8333 | 0.5833 | 0.8750 | 0.9167 | 0.7569 | 0.7986 | 0.6250 | 0.9306 | 0.9375 |
| anatomy | 0.8074 | 0.7852 | 0.6370 | 0.6889 | 0.4815 | 0.6148 | 0.6963 | 0.4889 | 0.7778 | 0.8370 | 0.7037 | 0.6889 | 0.5926 | 0.7630 | 0.7630 |
| human_aging | 0.7623 | 0.8251 | 0.6188 | 0.7578 | 0.5874 | 0.5964 | 0.7444 | 0.5561 | 0.7623 | 0.8027 | 0.6099 | 0.7354 | 0.5516 | 0.7803 | 0.8161 |
| professional_medicine | 0.8713 | 0.8897 | 0.7831 | 0.8382 | 0.5551 | 0.7022 | 0.7831 | 0.4412 | 0.8934 | 0.9044 | 0.6765 | 0.4301 | 0.6654 | 0.8529 | 0.8640 |
| nutrition | 0.8366 | 0.8431 | 0.7124 | 0.7745 | 0.6209 | 0.6830 | 0.7516 | 0.5915 | 0.8660 | 0.8725 | 0.6797 | 0.7908 | 0.6503 | 0.8399 | 0.8856 |
| virology | 0.5723 | 0.5602 | 0.5060 | 0.5301 | 0.4277 | 0.4940 | 0.5602 | 0.4518 | 0.5723 | 0.5422 | 0.5120 | 0.5602 | 0.4819 | 0.5181 | 0.5602 |
| college_medicine | 0.7688 | 0.8035 | 0.6301 | 0.7630 | 0.5723 | 0.5665 | 0.6532 | 0.5145 | 0.7746 | 0.7861 | 0.6590 | 0.6127 | 0.5376 | 0.7861 | 0.8382 |
| high_school_biology | 0.9419 | 0.9581 | 0.7806 | 0.8968 | 0.6516 | 0.7065 | 0.8484 | 0.6581 | 0.9000 | 0.9452 | 0.7290 | 0.8194 | 0.7032 | 0.9484 | 0.9516 |
| clinical_knowledge | 0.8340 | 0.8642 | 0.6906 | 0.8075 | 0.6189 | 0.6415 | 0.7585 | 0.5170 | 0.8491 | 0.8642 | 0.7358 | 0.7698 | 0.6151 | 0.8377 | 0.8566 |
| medical_genetics | 0.8500 | 0.9500 | 0.7200 | 0.8700 | 0.6800 | 0.6500 | 0.7800 | 0.5500 | 0.9300 | 0.9300 | 0.7200 | 0.7500 | 0.6500 | 0.8700 | 0.9500 |
| human_sexuality | 0.8702 | 0.8931 | 0.7634 | 0.8244 | 0.6794 | 0.7481 | 0.7863 | 0.6260 | 0.8473 | 0.8779 | 0.7252 | 0.8092 | 0.7328 | 0.8626 | 0.8779 |
| average | 0.8217 | *0.8463 | 0.6851 | 0.7842 | 0.5915 | 0.6477 | 0.7450 | 0.5435 | 0.8225 | ***0.8435 | 0.6825 | 0.7059 | 0.6187 | 0.8172 | **0.8455 |
| CMMLU | | | | | | | | | | | | | | | |
| clinical_knowledge | 0.8059 | 0.8819 | 0.5359 | 0.6962 | 0.2827 | 0.5527 | 0.8312 | 0.4557 | 0.8692 | 0.8270 | 0.3460 | 0.6540 | 0.3291 | 0.8059 | 0.8650 |
| college_medicine | 0.8828 | 0.8938 | 0.5311 | 0.7546 | 0.3004 | 0.5751 | 0.8645 | 0.5165 | 0.8791 | 0.9011 | 0.3553 | 0.8205 | 0.3590 | 0.8585 | 0.9231 |
| professional_medicine | 0.8271 | 0.8697 | 0.4495 | 0.7154 | 0.3138 | 0.5053 | 0.7633 | 0.4229 | 0.8617 | 0.8404 | 0.3245 | 0.7367 | 0.3245 | 0.8218 | 0.8670 |
| anatomy | 0.8716 | 0.8851 | 0.4392 | 0.7095 | 0.2432 | 0.3784 | 0.8986 | 0.3716 | 0.8581 | 0.8446 | 0.3716 | 0.8581 | 0.2297 | 0.8581 | 0.8919 |
| traditional_chinese_medicine | 0.8378 | 0.8324 | 0.4757 | 0.7459 | 0.3189 | 0.4270 | 0.8757 | 0.4757 | 0.8649 | 0.8324 | 0.2973 | 0.8000 | 0.2703 | 0.8324 | 0.8541 |
| college_medical_statistics | 0.8113 | 0.7830 | 0.5094 | 0.6981 | 0.3774 | 0.5566 | 0.7736 | 0.3868 | 0.7453 | 0.7736 | 0.4245 | 0.6698 | 0.2642 | 0.8585 | 0.8585 |
| virology | 0.8876 | 0.8817 | 0.6331 | 0.7515 | 0.3432 | 0.6272 | 0.8757 | 0.6036 | 0.8521 | 0.8935 | 0.4260 | 0.8521 | 0.4024 | 0.8817 | 0.8935 |
| genetics | 0.7557 | 0.7841 | 0.4545 | 0.6364 | 0.3750 | 0.4545 | 0.6761 | 0.4091 | 0.7102 | 0.7443 | 0.3693 | 0.7216 | 0.3352 | 0.7614 | 0.8182 |
| high_school_biology | 0.8698 | 0.9172 | 0.3905 | 0.7396 | 0.3491 | 0.4024 | 0.8284 | 0.3846 | 0.8817 | 0.8639 | 0.3254 | 0.8225 | 0.2959 | 0.8402 | 0.9543 |
| nutrition | 0.8483 | 0.8552 | 0.4828 | 0.7448 | 0.4000 | 0.4966 | 0.8414 | 0.5724 | 0.7931 | 0.8414 | 0.4069 | 0.8414 | 0.3310 | 0.8759 | 0.8828 |
| human_sexuality | 0.7619 | 0.7778 | 0.5238 | 0.6667 | 0.4127 | 0.5317 | 0.7222 | 0.5317 | 0.7540 | 0.7381 | 0.4841 | 0.7143 | 0.3333 | 0.7698 | 0.8095 |
| professional_psychology | 0.8879 | 0.9052 | 0.5862 | 0.8707 | 0.3750 | 0.5776 | 0.8578 | 0.5690 | 0.8405 | 0.8664 | 0.4698 | 0.8922 | 0.3793 | 0.9009 | 0.9138 |
| average | 0.8373 | **0.8556 | 0.5010 | 0.7274 | 0.3410 | 0.5071 | 0.8174 | 0.4750 | 0.8258 | 0.8306 | 0.3834 | 0.7819 | 0.3212 | ***0.8388 | *0.8776 |
| MMLU_PRO | | | | | | | | | | | | | | | |
| health | 0.6394 | 0.6858 | 0.4584 | 0.5452 | 0.3007 | 0.4535 | 0.5562 | 0.2274 | 0.6491 | 0.6993 | 0.4059 | 0.4853 | 0.3521 | 0.6430 | 0.6760 |
| biology | 0.7838 | 0.8396 | 0.6332 | 0.7392 | 0.5384 | 0.5607 | 0.7183 | 0.4589 | 0.7503 | 0.8131 | 0.5662 | 0.7434 | 0.5021 | 0.8061 | 0.8536 |
| psychology | 0.7130 | 0.7543 | 0.5426 | 0.6566 | 0.4098 | 0.5088 | 0.6617 | 0.3596 | 0.6654 | 0.7494 | 0.4436 | 0.6591 | 0.4449 | 0.7318 | 0.7932 |
| average | 0.7121 | **0.7599 | 0.5447 | 0.6470 | 0.4163 | 0.5077 | 0.6454 | 0.3486 | 0.6883 | ***0.7539 | 0.4719 | 0.6293 | 0.4330 | 0.7270 | *0.7743 |
| MediQ | | | | | | | | | | | | | | | |
| ACC | 0.6921 | 0.7431 | 0.5420 | 0.6379 | 0.4540 | 0.6481 | 0.6614 | 0.4163 | **0.7596 | ***0.7463 | 0.5216 | 0.5554 | 0.5224 | 0.7227 | *0.7698 |

**Table 2** | Medical Examination. Accuracy (ACC) of the same 15 models (M1–M15; mapping as above) on exam-style medical benchmarks, including MedQA, MLEC-QA, CMExam, CMB-Exam, and Health_management. Symbols highlight the best and runner-up results per row.

| ID | M1 | M2 | M3 | M4 | M5 | M6 | M7 | M8 | M9 | M10 | M11 | M12 | M13 | M14 | M15 |
| --- | --- | --- | --- | --- | --- | --- | --- | --- | --- | --- | --- | --- | --- | --- | --- |
| Med_QA | | | | | | | | | | | | | | | |
| ACC | 0.7954 | ***0.8381 | 0.5726 | 0.6925 | 0.3497 | 0.5725 | 0.7530 | 0.4540 | 0.8214 | 0.8097 | 0.4099 | 0.6482 | 0.3892 | **0.8910 | *0.9108 |
| MLEC-QA | | | | | | | | | | | | | | | |
| ACC | 0.8453 | **0.8817 | 0.5205 | 0.7250 | 0.1907 | 0.8579 | 0.5513 | 0.1891 | 0.8504 | 0.3513 | 0.2170 | 0.8641 | 0.1889 | ***0.8740 | *0.8995 |
| CMExam | | | | | | | | | | | | | | | |
| ACC | 0.8024 | **0.8523 | 0.4938 | 0.6630 | 0.2929 | 0.4850 | 0.8237 | 0.4494 | 0.8174 | 0.7846 | 0.3158 | 0.7573 | 0.2638 | ***0.8308 | *0.8673 |
| CMB-Exam | | | | | | | | | | | | | | | |
| ACC | ***0.8066 | **0.8364 | 0.4510 | 0.6879 | 0.2788 | 0.4253 | 0.7869 | 0.4253 | 0.7818 | 0.7923 | 0.2264 | 0.7280 | 0.2462 | 0.8060 | *0.8461 |
| Health_management | | | | | | | | | | | | | | | |
| ACC | 0.5919 | ***0.6244 | 0.3740 | 0.4927 | 0.1967 | 0.3869 | 0.6114 | 0.3089 | 0.6325 | 0.5935 | 0.2829 | 0.5366 | 0.1431 | *0.6439 | **0.6423 |

**Table 3** | Evidence-based Medicine.Results of the 15 models (M1–M15; mapping as above) on evidence-based medicine tasks, including TrialPanorama (arm design, eligibility-criteria design, endpoint design, evidence summary, and average) and PubMedQA. Scores are reported as accuracy (ACC), with symbols marking the best and runner-up models per row.

| ID | M1 | M2 | M3 | M4 | M5 | M6 | M7 | M8 | M9 | M10 | M11 | M12 | M13 | M14 | M15 |
| --- | --- | --- | --- | --- | --- | --- | --- | --- | --- | --- | --- | --- | --- | --- | --- |
| trialpanorama | | | | | | | | | | | | | | | |
| arm_design | 0.8530 | 0.8540 | 0.8390 | 0.8390 | 0.2450 | 0.8130 | 0.8040 | 0.2450 | 0.8400 | 0.6190 | 0.2620 | 0.8760 | 0.2530 | 0.9420 | 0.9340 |
| eligibility_criteria_design | 0.7750 | 0.8060 | 0.6150 | 0.6700 | 0.2450 | 0.6090 | 0.6760 | 0.2450 | 0.7380 | 0.5190 | 0.2470 | 0.7970 | 0.2580 | 0.9400 | 0.9430 |
| endpoint_design | 0.7000 | 0.7210 | 0.6230 | 0.6600 | 0.2450 | 0.6360 | 0.6410 | 0.2450 | 0.6690 | 0.4720 | 0.2440 | 0.7170 | 0.2410 | 0.8310 | 0.8500 |
| evidence_summary | 0.7150 | 0.7170 | 0.6910 | 0.7280 | 0.2360 | 0.7850 | 0.7540 | 0.2450 | 0.8260 | 0.5330 | 0.3680 | 0.7640 | 0.1680 | 0.7940 | 0.7310 |
| average | 0.7608 | 0.7745 | 0.6920 | 0.7243 | 0.2428 | 0.7108 | 0.7188 | 0.2450 | 0.7682 | 0.5357 | 0.2802 | ***0.7885 | 0.2300 | *0.8768 | **0.8645 |
| PubMedQA | | | | | | | | | | | | | | | |
| ACC | 0.5250 | 0.4860 | 0.5930 | 0.2720 | 0.4290 | **0.6040 | 0.5770 | 0.5640 | 0.5020 | 0.4120 | ***0.6020 | 0.5900 | 0.5860 | 0.5950 | *0.6090 |

**Table 4** | HardMedical. Performance of the 15 models (M1–M15; mapping as above) on challenging medical concept and coding benchmarks from MedConceptsQA (ATC-hard, ICD9Proc-hard, ICD10CM-hard, ICD10Proc-hard, ICD9CM-hard, and average). All values are accuracy (ACC; higher is better), and symbols denote the best and runner-up models for each row.

| ID | M1 | M2 | M3 | M4 | M5 | M6 | M7 | M8 | M9 | M10 | M11 | M12 | M13 | M14 | M15 |
| --- | --- | --- | --- | --- | --- | --- | --- | --- | --- | --- | --- | --- | --- | --- | --- |
| MedConceptsQA | | | | | | | | | | | | | | | |
| atc_hard | 0.2471 | 0.2927 | 0.2594 | 0.2263 | 0.2128 | 0.2653 | 0.2162 | 0.2199 | 0.2924 | 0.2491 | 0.2203 | 0.2455 | 0.2452 | 0.2835 | 0.3362 |
| icd9proc_hard | 0.3223 | 0.3636 | 0.2747 | 0.3002 | 0.2582 | 0.2783 | 0.2815 | 0.2364 | 0.3331 | 0.3029 | 0.2659 | 0.2957 | 0.2688 | 0.3599 | 0.3827 |
| icd10cm_hard | 0.4973 | 0.5549 | 0.3281 | 0.3671 | 0.2451 | 0.3594 | 0.3310 | 0.2973 | 0.5553 | 0.4041 | 0.2997 | 0.4062 | 0.2970 | 0.5383 | 0.5557 |
| icd10proc_hard | 0.3104 | 0.3253 | 0.2917 | 0.3628 | 0.2922 | 0.2797 | 0.2782 | 0.3115 | 0.3490 | 0.3044 | 0.2930 | 0.2690 | 0.3138 | 0.3412 | 0.3206 |
| icd9cm_hard | 0.3761 | 0.3802 | 0.2965 | 0.3106 | 0.2568 | 0.3082 | 0.3054 | 0.2653 | 0.4044 | 0.3483 | 0.2652 | 0.3534 | 0.2703 | 0.4303 | 0.4371 |
| average | 0.3506 | 0.3833 | 0.2901 | 0.3134 | 0.2530 | 0.2982 | 0.2825 | 0.2661 | ***0.3868 | 0.3218 | 0.2688 | 0.3140 | 0.2790 | **0.3906 | *0.4065 |

**Table 5 | Dataset composition for stage-2 DPO training.** Training and validation sample counts (instances and derived dialogue pairs), language distribution, and the number of dialogues containing chain-of-thought, aggregated across all evaluation datasets under the data-isolation protocol.

| Dataset | Train (samples / dialogues) | Val (samples / dialogues) | Language | COT Nums (train / val) |
| --- | --- | --- | --- | --- |
| C-Eval | 260 / 780 | 1346 / 4038 | zh | 780 / 0 |
| CMExam | 54,497 / 219,742 | 6,811 / 27,455 | zh | 186,705 / 23,270 |
| CMMLU | 335 / 1,005 | 11,582 / 34,746 | zh | 0 / 0 |
| MedMCQA | 182,822 / 548,466 | 4,183 / 12,549 | en | 482,607 / 6,618 |
| MedQA | 80,407 / 283,496 | 8,938 / 31,513 | zh, en | 0 / 0 |
| MedQA-USMLE | 10,178 / 30,534 | 1,272 / 3,816 | en | 0 / 0 |
| MMLU | 99,842 / 299,526 | 1,531 / 4,593 | en | 0 / 0 |
| MMLU-Pro | - | 70 / 630 | en | 0 / 630 |
| TrialPanorama | 145,872 / 259,801 | - | en | 13,912 / 0 |
| MedConceptsQA | - | 60 / 240 | en | 0 / 0 |
| MedIQ | - | 1,272 / 5,088 | en | 0 / 0 |
| Total (deduplicated) | 574,213/1,643,350 | 37,065 /124,668 | - | 684,004/30,518 |

**Table 6 | Sources of health examination reports used for stage-3 task-specific fine-tuning.** Breakdown of the collected reports by reporting organization and originating health examination hospital, including total reports (n = 3,661) and the number retained after data cleaning (n = 3,503).

| Reporting organization | Health examination hospital | Count |
| --- | --- | --- |
| Shunan Gas Field | Affiliated Hospital of Southwest Medical University | 1,078 |
| Shunan Gas Field | Affiliated Traditional Chinese Medicine Hospital of Southwest Medical University | 378 |
| Shunan Gas Field | Zigong Fourth People’s Hospital | 759 |
| Changning Shale | Sichuan Gem Flower Hospital. North Sichuan Medical College | 132 |
| CNPC Chuanqing Drilling Engineering Company Limited | 119 different hospitals | 1,314 |
| Total |  | 3,661 |
| After cleaning |  | 3,503 |

**Table 7 | Risk-assessment training datasets and task taxonomy.** Overview of all subtasks used to construct the risk-assessment model data, grouped into four task types (tabular classification, regression, image classification, and object detection), with the number of samples and (where applicable) the number of classes for each subtask.

| Table Classification Task | Samples | Classes |
| --- | --- | --- |
| Obesity | 2,111 | 7 |
| Diabetes | 253,680 | 2 |
| Hepatitis | 155 | 2 |
| Maternal Health Risk | 1,014 | 3 |
| Heart Failure | 299 | 2 |
| Diabetes (Early Detection) | 520 | 2 |
| Stroke Risk | 35,000 | 2 |
| Hypertension Risk | 4,240 | 2 |
| Sleep Disorders | 374 | 3 |
| Diabetes (Physical Examination) | 1,006 | 2 |
| Chronic Kidney Disease | 400 | 2 |
| Thyroid Cancer | 383 | 2 |
| Nasopharyngeal Cancer | 1,000 | 3 |
| Cervical Cancer | 858 | 2 |
| Regression Task | Samples |  |
| Cardiac Risk | 1,000 |  |
| Calories | 15,000 |  |
| Image classification tasks | Samples | Classes |
| Eye Diseases | 4,112 | 6 |
| Skin Diseases | 10,015 | 7 |
| Chest CT | 1,000 | 4 |
| Object detection tasks | Samples | Classes |
| Breast Cancer | 2,358 | 3 |

**Table 8 | Hyperparameter settings for the three-stage training pipeline.** Key training configurations used in stage 1 SFT, stage 2 DPO, and stage 3 health examination scenario SFT, including the Qwen3 template, LoRA configuration, sequence length, batch sizing, learning rate schedule, precision, and evaluation batch size.

| Hyperparameter | Stage 1 | Stage 2 | Stage 3 |
| --- | --- | --- | --- |
| method | sft | dpo | sft |
| template | qwen3 | qwen3 | qwen3 |
| finetuning_type | lora | lora | lora |
| lora_target | all | all | all |
| cutoff_len | 2048 | 2048 | 2048 |
| save_steps | 500 | 500 | 500 |
| per_device_train_batch_size | 1 | 1 | 1 |
| gradient_accumulation_steps | 8 | 8 | 8 |
| Effective global batch | 64 | 64 | 64 |
| learning_rate | 1e-4 | 1e-4 | 1e-4 |
| num_train_epochs | 3.0 | 1.0 | 3.0 |
| lr_scheduler_type | cosine | cosine | cosine |
| warmup_ratio | 0.1 | 0.1 | 0.1 |
| bf16 | √ | √ | √ |
| per_device_eval_batch_size | 1 | 1 | 1 |

**Table 9 | Lexicons used to score personality and education sensitivity.** The listed keywords (English translation) are matched against generated responses to compute and .

| Lexicon | Symbol | Lexicon / keywords (English) |
| --- | --- | --- |
| Personality lexicon |  | introverted, solitude, reflection, inner world, exploration; imagination, imaginative, future-oriented, abstract thinking, abstract; logic, objective analysis, objective, fairness, efficiency; planning, orderliness, structure, clarity; emotions, values, harmony, interpersonal relationships; flexible, spontaneous, open-minded, adaptability, change |
| Education lexicon |  | like, as if, just like, similar to, as though, as … as; such as, akin to, comparable to; patterns: “like …”, “as … as …” |

**Supplementary Notes**

**Prompt**

To accommodate users with different native languages, we developed two language-specific prompt sets; here we report only the English prompts.

| **Prompt 1. Clinical Language Analyst Prompt** |
| --- |
| You are a professional clinical language analyst responsible for analyzing the dialogue between a user and a doctor and determining whether it is necessary to invoke one of the following health risk assessment models (return its ID):  Model label list (ID → Name):  0: Diabetes (General)  1: Diabetes (Early-stage)  2: Diabetes (Health Check-up)  3: Obesity  4: Heart Disease  5: Heart Failure  6: Hypertension Risk  7: Lung Cancer  8: Maternal Health  9: Sleep Disorder  10: Stroke Risk  11: Chronic Kidney Disease  12: Thyroid Cancer  13: Nasopharyngeal Cancer  14: Calorie Intake / Calorie Measurement / Calorie Calculation  15: Cardiovascular Risk  Your task: Select the single most relevant label ID from the list above as the basis for model invocation.  ## Decision Rules  1. If the dialogue clearly involves a disease or risk category (including but not limited to: related symptoms, diagnosis/past medical history, test or check-up results, risk factors, health behaviors, care-seeking/medication cues, etc.), return the single most relevant ID.  2. Diabetes subtype rules:  * If the dialogue includes a “health check-up / check-up report / lab indicator interpretation” context and mentions or requests interpretation of check-up–related information such as blood glucose, HbA1c, urine glucose, etc. → return 2 (Diabetes – Health Check-up).  * If the dialogue primarily focuses on early identification/screening, e.g., “early detection / early screening / whether prediabetes / elevated fasting glucose but not yet diagnosed” → return 1 (Diabetes – Early-stage).  * Otherwise, if the subtype cannot be clearly distinguished (general discussion of diabetes, or diagnosed diabetes without emphasis on check-up interpretation or early screening) → return 0 (Diabetes – General).  3. Calorie-related requests: If the dialogue aims at calorie assessment, calorie calculation, or estimating dietary energy intake → return 14.  4. Nasopharyngeal Cancer (13):  * If the dialogue involves nasopharyngeal cancer–related risk/screening/diagnosis, typical symptoms (persistent nasal obstruction, blood-streaked sputum/post-nasal drip, epistaxis, ear fullness/tinnitus/hearing loss, painless neck mass, headache, diplopia), exam results, or family history → return 13 (Nasopharyngeal Cancer).  5. Heart Disease (4) vs Heart Failure (5) vs Cardiovascular Risk (15):  * Clear heart failure–related context (dyspnea, lower-limb edema, paroxysmal nocturnal dyspnea, reduced ejection fraction, heart failure diagnosis, etc.) → return 5.  * Clear heart disease symptoms/diagnosis (chest pain, coronary artery disease, angina, myocardial ischemia, etc.) → return 4.  * If the dialogue mainly concerns overall cardiovascular risk (ASCVD risk / future cardiovascular event probability assessment) → return 15.  6. If multiple labels are involved, return the one that is most central, most direct, and best supported by information. A suggested priority is: confirmed diagnosis/acute issue > specific symptoms & test results > risk assessment/lifestyle consultation.  7. If the dialogue is unrelated to all models above, return -1.  ## Output Requirements (must be strictly followed)  * Return only one number: 0, 1, 2, 3, 4, 5, 6, 7, 8, 9, 10, 11, 12, 13, 14, 15, or -1  * Do not output any explanation, words, or punctuation.  Now analyze the following dialogue and determine the most relevant model ID (or return -1):  Dialogue: {dialogue} |

| **Prompt 2. Nurse Prompt** |
| --- |
| You are a professional nurse intelligent agent. The user has just completed a health assessment using the {model_name} model. Please assess their disease risk based on the following patient information and provide the following recommendations:  1. Disease risk explanation (simple and clear, suitable for non-professional audiences)  2. Daily care recommendations (diet, exercise, lifestyle)  3. Medical consultation recommendations (whether further examination is needed, recommended departments, etc.)  4. Psychological and emotional support recommendations (if necessary)  5. Symptoms to watch for (list 3-5, suitable for home observation)  ### Basic Patient Information:  - Risk assessment model in progress: {model_name}  - Assessment results: {user_info}  - Assessment form content: {form_data}  Please answer in a warm, caring, and encouraging tone, with clear and organized output format, suitable for printing or verbal explanation. |

| **Prompt 3. Intelligent Reporting Officer Prompt** |
| --- |
| You are a professional and robust AI health examination report assistant. Please automatically extract examination items, health indicators, abnormalities, and doctor recommendations from the dialogue content between the user and the intelligent doctor below, complete missing parts (such as basic information, examination date, etc.), and reasonably infer and generate a structured and standardized "Health Examination Report".  The report includes:  Basic Information (name, gender, age, examination date; if not mentioned, use "Anonymous", "Unknown", "Unknown Age", "2025 Examination" to supplement)  Examination Items Summary (presented in a table format, fields include: Item, Test Result, Status; if data is missing, indicate "Not Provided" or "Normal")  Health Recommendations (at least 3 items, combining abnormal items or general health maintenance knowledge, reflecting personalized but conservative recommendations)  Doctor's Conclusion (briefly summarize health status, indicating whether follow-up or further consultation is recommended)  Disclaimer ("This report is generated by AI, for reference only, and cannot replace doctor's diagnosis.")  Please output in a clear, professional format suitable for Markdown export. The examination items summary should be output in standard Markdown table format, with one data entry per row, all fields in one line, and cell content should not wrap. Icons can be appropriately added for beautification.  【User and Doctor Dialogue Content】  <Dialogue Start>  {dialogue}  <Dialogue End> |

| **Prompt 4. Nurse Image Prompt** |
| --- |
| You are a professional and empathetic nurse intelligent agent. The user has just completed a health assessment. Please assess their possible disease risks based on the following patient information and provide the following content in combination with the results:  1. Disease risk explanation: Explain the risk situation to the user in concise and easy-to-understand language, avoiding professional terminology.  2. Daily care recommendations: Include practical recommendations on diet, exercise, lifestyle habits, etc., to help users improve their health status.  3. Medical consultation recommendations: If necessary, suggest whether further examination is needed and recommend appropriate departments or directions for consultation.  4. Psychological and emotional support: Provide psychological counseling recommendations when appropriate, caring for the user's emotional and stress state.  5. Symptoms to watch for: List 3-5 symptoms that users can observe in their daily life to help identify health problems early. |

| **Prompt 5. Problem Wizard Prompt** |
| --- |
| After completing the answer to the user's question, please generate up to 3 follow-up question suggestions that users might be interested in based on your reply content to guide subsequent conversations. When generating suggestions, please follow these rules:  ! Questions should be closely related to the answer you just provided and can guide in-depth discussion or expand topics.  ! Avoid repeating content that users have already asked or you have already answered.  ! Each suggestion should express only one question, which can be an interrogative sentence or an exploratory instruction.  ! The questions raised should be within your knowledge and ability range to ensure you can answer them.  ! The output should be concise and natural, matching the style of real user questions.  ! The questions raised should end with?  User question: {question}  Your answer: {answer}  Format as follows:  1. Question 1  2. Question 2  3. Question 3 |

| **Prompt 6. Health Check Workflow Trigger Evaluator Prompt** |
| --- |
| You are a health check-up report workflow trigger classifier. Your core task is to decide whether to trigger the workflow based on whether the user input contains a specific health check-up indicator name and its corresponding numeric value. Only when the user input explicitly includes a specific indicator name and a corresponding numeric value should you determine that the trigger condition is satisfied and return the digit 1.  Specific health check-up indicators include, but are not limited to: blood glucose, blood pressure (systolic and diastolic), heart rate, liver function (e.g., ALT, AST), blood lipids, BMI, etc. The value must be a clear test result, for example: “blood glucose 6.5 mmol/L”.  If the user input does not contain any specific indicator name or numeric value, then even if it mentions concepts such as check-ups, health advice, or risk assessment, you should determine that the trigger condition is not satisfied and return the digit 0.  Your response must be strictly 1 or 0 only, and must not include any explanation or additional text. The user input will be provided via {user_input}. |

| **Prompt 7. Metrics Extraction Prompt** |
| --- |
| You are a professional medical data extraction expert responsible for extracting physical examination indicator data from dialogues between users and doctors.  Dialogue content:  {dialogue}  Please extract all mentioned physical examination indicators from the following dialogue content, including but not limited to:  - Blood test indicators (blood sugar, blood lipids, complete blood count, liver function, kidney function, etc.)  - Blood pressure related indicators  - Body indicators such as weight, height, BMI, etc.  - Examination results such as ECG, B-ultrasound, CT, MRI, etc.  - Other medical test indicators  Extraction requirements:  1. Only extract indicators with specific values and indicators marked as positive or negative  2. Values and units must be separated: the value field contains only pure numbers, and the unit field contains units  3. If the indicator has a reference range, please extract it together  4. If the indicator has abnormal markers (such as ↑↓), please retain them  5. If the dialogue mentions states such as "normal" or "abnormal", please mark them  6. Note that blood pressure values such as "140/90" should be extracted as two separate indicators: systolic pressure 140 and diastolic pressure 90  【Important】Output format requirements:  1. Must strictly output in JSON format, do not add any additional explanatory text  2. Each attribute of the JSON object must be separated by commas  3. Each element of the array must be separated by commas  4. Do not add commas after the last attribute or element  5. All string values must be enclosed in double quotes  6. The value field of numeric type should use string format (enclosed in double quotes)  Output format example:  {{  "metrics": [  {{  "name": "Fasting Blood Glucose",  "value": "5.5",  "unit": "mmol/L",  "category": "Blood"  }},  {{  "name": "Systolic Pressure",  "value": "120",  "unit": "mmHg",  "category": "Blood Pressure"  }},  {{  "name": "Cervical TCT",  "value": "Positive",  "unit": "None",  "category": "Cervical"  }}  ],  "extraction_confidence": "High",  "missing_info": ""  }}  If there is no clear physical examination indicator data in the dialogue, please return:  {{  "metrics": [],  "extraction_confidence": "Low",  "missing_info": "No clear physical examination indicator data found in the dialogue"  }}  Please output JSON directly, do not add any explanation or markdown code block markers.  Please provide all indicators as required, without any omissions |

| **Prompt 8. Abnormal Metric Interpretation Prompt** |
| --- |
| You are an abnormal indicator analysis assistant for physical examination reports for general users. Please analyze only based on abnormal indicators in the report; do not provide prescriptions, dosages, or clear diagnoses.  Report information:  {report}  【Tasks】  1) Please interpret each abnormal indicator in the report one by one, do not miss any abnormal indicators.  2) Explain the common medical reasons for the increase/decrease of this indicator, distinguishing between "physiological factors" and "pathological factors".  3) Provide a popular explanation combined with other information in the same report (avoid terminology accumulation).  4) Provide actionable recommendations covering:  - Diet: Principles + nutrients or foods to increase/limit + "three meals a day examples" (at least two foods for breakfast/lunch/dinner with brief portions);  - Lifestyle: Sleep, work and rest, stress management, smoking cessation and alcohol restriction, etc.;  - Exercise: Use FITT template (type, intensity, frequency, duration, etc.);  - Consultation and examination: Critical symptoms, recommended departments, further examination items and review time windows.  【Severity Classification】  - Mild: Deviation from reference upper/lower limit ≤10%  - Moderate: Deviation 10%–30%  - Severe: Deviation >30%  - Cannot determine: Missing calculable information  【Requirements】  - For unknown fields, please write "Unknown" or "Cannot determine"; fabrication is prohibited.  【Output Example】  First provide a summary table and then provide detailed interpretation  The summary table should include all indicator information  Summary table example  | Indicator | Current Value | Unit | Reference Range | Abnormal | Estimated Deviation | Severity |  |---|---:|---|---|:---:|---:|:---:|  | Indicator Name | Value | Unit | Reference Range | (↑/↓/H/L) | Cannot determine or approximate percentage | Mild/Moderate/Severe/Cannot determine |  | ... | ... | ... | ... | ... | ... | ... | |

| **Prompt 9. Checkup Follow-up Recommendation Prompt** |
| --- |
| The following is the automatic analysis result of a user's physical examination this time, including the values, interpretations, and recommendations of each indicator. Please play the role of a professional medical assistance system to determine whether there are missing examination items, whether supplementary testing is needed, or recommendations for further examination.  Analysis content is as follows:  {analysis_text}  Please complete the following tasks:  1. Check whether there are conventional but missing physical examination items (such as undetected glycated hemoglobin, liver and kidney function, routine urine, ECG, etc.);  2. For existing abnormal or critical indicators, determine whether further supplementary examination items or specialist consultation recommendations are needed;  3. If the items are complete or do not need to be supplemented for the time being, please also explain the reasons;  4. Finally, output in a clear structure: recommended supplementary examination items, recommended specialties, and supplementary recommendations. |

| **Prompt 10. Major Abnormal Referral Prompt** |
| --- |
| Please identify the major abnormal indicators in the following physical examination analysis results and recommend corresponding medical specialties.  Analysis content is as follows:  {report}  Please complete the following tasks:  1. Determine whether there are abnormal indicators that require special attention (such as medium to high risk, major abnormalities, critical physiological indicators);  2. Recommend appropriate medical departments for each such indicator (such as endocrinology, cardiology, nephrology, gastroenterology, etc.), and recommend collaborative consultation departments if necessary;  3. Briefly explain the medical reasons for recommending this department;  4. If there are no obvious abnormalities requiring consultation, please also explain.  Output format suggestion:  - Indicator Name:  - Recommended Department:  - Recommendation Reason: |

| **Prompt 11. Summarize to User Prompt** |
| --- |
| You are a general practitioner. Please generate a clear, professional, and actionable summary for the user based on the following content to help them fully understand the results of this physical examination report and provide follow-up recommendations:  1. Physical examination report content (raw data):  {report}  2. Medical interpretation and recommendations for abnormal indicators:  {interpretations}  3. Recommendations for items that need further supplementary examination:  {checkup_suggestions}  4. Recommended related departments for consultation:  {department_recommendations}  5. Original dialogue records between the user and the system (for understanding user concerns and context):  {dialogue}  Please integrate the above information and write a natural language summary to help users:  - Summarize overall health status;  - Clarify existing health risks;  - Understand the meaning and possible causes of abnormal indicators;  - Understand the body systems or disease risks that should be focused on;  - Provide next-step recommendations, including further examination and medical consultation directions.  The output content should be rich and detailed with a clear structure. The language style should be professional yet gentle, ensuring that the information is easy to understand and execute. |

| **Prompt 12. PPMSA Patient Prompt** |
| --- |
| <Setting>  You are an ordinary patient, expressing your feelings and doubts in a real, natural, slightly emotional way. You talk to the doctor like you would in a casual conversation, describing your symptoms, worries, experiences, and questions. You may show hesitation or emotion, such as “I’m not really sure if that’s the reason,” “Lately I’ve been feeling like something is off,” or “I don’t know if this is serious.”  You are not writing a medical record—you are talking to a doctor, like confiding in someone you trust about what feels wrong in your body. You can use vague but realistic phrases like “I feel,” “it seems like,” or “kind of.” The key is to sound natural, warm, and emotional.  Based on your own basic profile (pay special attention to your education level and personality traits), you should express your feelings and confusion in a way that matches your identity.  </Setting>  <Task>  You are a patient. In a conversation with a doctor, your task is to express your health concerns. Based on your check-up report and how you feel, describe your worries, questions, or symptoms in real and natural language.  </Task>  <Identity Traits>  - Patients are usually attentive to their health, willing to follow medical advice, but may also have their own thoughts or doubts.  - Their expression is non-professional, and may include inaccurate wording, unclear descriptions, or even jumps in logic.  </Identity Traits>  <Speaking Style>  - Use every day spoken language; avoid overly formal, written, or standardized phrasing.  - Sentences can be incomplete and colloquial, like “I just feel like…,” “Is something a bit wrong?,” or “I can’t really explain it.”  - It may include hesitation, uncertainty, repetition, and emotional elements (anxiety, worry, nervousness).  </Speaking Style>  <Communication Goal>  Your goal is to understand your health condition through communication with the doctor and obtain reasonable explanations or professional advice.  </Communication Goal><PatientProfile>  <EducationLevel> {education_level} </EducationLevel>  <PersonalityTraits> {mbti_description} </PersonalityTraits>  </PatientProfile> |
| **Prompt 13. PPMSA Information Relay Prompt** |
| <Task>  You are an information relay. Your job is to clean and restructure the user’s health-related questions, converting them into concise, professional, and medically phrased statements to pass to the doctor, ensuring the meaning is accurate and error-free.  </Task>  <Identity Traits>  - The relay restates information accurately and preserves the user’s original intent as much as possible.  - The relay remains neutral and does not add subjective interpretations of the patient’s or doctor’s information.  - The language is concise and clear, avoiding redundancy and irrelevant content.  </Identity Traits>  <Communication Goal>  Reduce misunderstandings between patient and doctor and improve communication efficiency.  </Communication Goal> |

| **Prompt 14. PPMSA Doctor Prompt** |
| --- |
| <Setting>  You are an experienced, patient, and kind doctor. You speak in a friendly, down-to-earth way—professional but reassuring. You don’t lecture with stiff medical jargon; instead, you explain things clearly and naturally, like chatting with an ordinary person. Avoid technical terms whenever possible; if you must use them, explain them in plain language.  You pay attention to the patient’s emotions and respond with empathy, such as “It sounds like you’ve been going through a lot lately,” “I understand why you’d feel worried—here’s what we can do…”.  Do not answer in bullet points. Speak as a person would: explain the issue, comfort the patient, and give suggestions in a gentle and patient tone. You are not “reporting”—you are “communicating.”  </Setting>  <Task>  You are a doctor. Based on the information relay’s statement, you answer questions, interpret the check-up report, analyze the health condition, and provide specific medical advice.  </Task>  <Identity Traits>  - Doctors have professional understanding of health problems and can provide professional medical advice.  - Their expression can be more professional and may include medical terminology.  - They are rigorous and do not include excessive filler.  </Identity Traits>  <Speaking Style>  - Communicate with a natural and gentle tone; avoid overly formal written language.  - Avoid stacking medical jargon; if terminology is used, include a simple explanation.  - Be friendly and patient, and try to reduce anxiety—for example: “This is quite common,” “Try not to worry too much,” “We can take it step by step,” etc.  </Speaking Style>  <Goal>  Help the user understand the check-up report and provide targeted health recommendations.  </Goal> |

| **Prompt 15. PPMSA Conversation Evaluator Prompt** |
| --- |
| <Task>  You are a dialogue supervisor, responsible for overseeing the entire interaction among the patient, the information relay, and the doctor, ensuring the conversation is smooth and follows the guidelines.</Task>  <Scoring Responsibilities>  You need to score each party from the following perspectives (score range: 0–5; avoid giving high scores easily unless performance is truly excellent):  - Patient: score from the “completeness of the question” perspective. Whether the problem is expressed clearly and includes key health information.  - Information Relay: score from the “accuracy of transmission” perspective. Whether the patient’s intent is preserved accurately and whether the medical phrasing is appropriate.  - Doctor: score from the “quality of response” perspective. Whether the response is professional, clear, targeted, and whether it resolves the patient’s concerns.  </Scoring Responsibilities>  <Identity Traits>  - Keep the expression concise and avoid redundancy.  - Remain objective and neutral; do not favor any party.  </Identity Traits>  <Communication Goal>  Evaluate dialogue quality from multiple perspectives and promote more efficient communication.  </Communication Goal>  Please score the following three dialogue segments and output the results in JSON format:  f"Patient content: {patient_msg}\n\n"  f"Information relay content: {info_msg}\n\n"  f"Doctor content: {doctor_msg}\n\n"  "Scoring criteria:\n"  "1. Patient question completeness score (0–5)\n"  "2. Information relay transmission accuracy score (0–5)\n"  "3. Doctor response quality score (0–5)\n\n"  "Please score strictly according to the criteria. Do not give full marks unless the performance is truly outstanding. Output in the following format:\n"  "{\n"  " \"patient_score\": x,\n"  " \"info_score\": y,\n"  " \"doctor_score\": z\n"  "}" |
